# Supplementary material
Source: publisher site journal article supplement (https://www.spandidos-publications.com/4760/downloadSupplementary)
Supplement: Supplementary file 1 [file downloadSupplementary]

## Sheet: all
Table SIII The interaction results of hepatocytes and T cells (ligand–receptor interactions)
joinlab	interacting_pair.x	CC.x	pvals	interacting_pair.y	CC.y	means	significance
ACVR_1A2A receptor_INHBA_T|hepatocyte	ACVR_1A2A receptor_INHBA	T|hepatocyte	0	ACVR_1A2A receptor_INHBA	T|hepatocyte	0.483	p < 0.01
ACVR2A_INHBC_T|hepatocyte	ACVR2A_INHBC	T|hepatocyte	0.012	ACVR2A_INHBC	T|hepatocyte	0.238	p < 0.05
ACVR2A_INHBE_hepatocyte|T	ACVR2A_INHBE	hepatocyte|T	0	ACVR2A_INHBE	hepatocyte|T	0.25	p < 0.01
ACVR2A_INHBE_T|T	ACVR2A_INHBE	T|T	0	ACVR2A_INHBE	T|T	0.242	p < 0.01
CD2_CD58_T|hepatocyte	CD2_CD58	T|hepatocyte	0	CD2_CD58	T|hepatocyte	0.849	p < 0.01
CD2_CD58_T|T	CD2_CD58	T|T	0	CD2_CD58	T|T	0.844	p < 0.01
CD40_CD40LG_hepatocyte|T	CD40_CD40LG	hepatocyte|T	0	CD40_CD40LG	hepatocyte|T	0.155	p < 0.01
CD40_TNFSF13B_hepatocyte|T	CD40_TNFSF13B	hepatocyte|T	0	CD40_TNFSF13B	hepatocyte|T	0.329	p < 0.01
CD40LG_a5b1 complex_T|hepatocyte	CD40LG_a5b1 complex	T|hepatocyte	0	CD40LG_a5b1 complex	T|hepatocyte	0.205	p < 0.01
CD44_FGFR2_T|hepatocyte	CD44_FGFR2	T|hepatocyte	0	CD44_FGFR2	T|hepatocyte	0.716	p < 0.01
CD44_FGFR2_T|T	CD44_FGFR2	T|T	0	CD44_FGFR2	T|T	0.507	p < 0.01
CD55_ADGRE5_T|T	CD55_ADGRE5	T|T	0	CD55_ADGRE5	T|T	0.275	p < 0.01
CD6_ALCAM_T|hepatocyte	CD6_ALCAM	T|hepatocyte	0	CD6_ALCAM	T|hepatocyte	0.987	p < 0.01
CD74_APP_T|hepatocyte	CD74_APP	T|hepatocyte	0	CD74_APP	T|hepatocyte	1.436	p < 0.01
CD74_MIF_hepatocyte|T	CD74_MIF	hepatocyte|T	0	CD74_MIF	hepatocyte|T	0.994	p < 0.01
CDH1_aEb7 complex_hepatocyte|T	CDH1_aEb7 complex	hepatocyte|T	0	CDH1_aEb7 complex	hepatocyte|T	0.234	p < 0.01
CDH1_KLRG1_hepatocyte|T	CDH1_KLRG1	hepatocyte|T	0	CDH1_KLRG1	hepatocyte|T	0.242	p < 0.01
COL18A1_a1b1 complex_hepatocyte|T	COL18A1_a1b1 complex	hepatocyte|T	0	COL18A1_a1b1 complex	hepatocyte|T	1.41	p < 0.01
COL1A2_a1b1 complex_T|hepatocyte	COL1A2_a1b1 complex	T|hepatocyte	0	COL1A2_a1b1 complex	T|hepatocyte	0.703	p < 0.01
COL1A2_a1b1 complex_T|T	COL1A2_a1b1 complex	T|T	0	COL1A2_a1b1 complex	T|T	0.641	p < 0.01
COL3A1_a1b1 complex_T|hepatocyte	COL3A1_a1b1 complex	T|hepatocyte	0	COL3A1_a1b1 complex	T|hepatocyte	0.716	p < 0.01
COL3A1_a1b1 complex_T|T	COL3A1_a1b1 complex	T|T	0	COL3A1_a1b1 complex	T|T	0.654	p < 0.01
COL4A1_a1b1 complex_T|hepatocyte	COL4A1_a1b1 complex	T|hepatocyte	0.032	COL4A1_a1b1 complex	T|hepatocyte	0.763	p < 0.05
COL4A2_a1b1 complex_T|hepatocyte	COL4A2_a1b1 complex	T|hepatocyte	0	COL4A2_a1b1 complex	T|hepatocyte	0.802	p < 0.01
COL6A1_a1b1 complex_T|hepatocyte	COL6A1_a1b1 complex	T|hepatocyte	0	COL6A1_a1b1 complex	T|hepatocyte	0.714	p < 0.01
COL6A1_a1b1 complex_T|T	COL6A1_a1b1 complex	T|T	0	COL6A1_a1b1 complex	T|T	0.651	p < 0.01
COL6A2_a1b1 complex_T|hepatocyte	COL6A2_a1b1 complex	T|hepatocyte	0	COL6A2_a1b1 complex	T|hepatocyte	0.718	p < 0.01
COL6A2_a1b1 complex_T|T	COL6A2_a1b1 complex	T|T	0.015	COL6A2_a1b1 complex	T|T	0.656	p < 0.05
CXADR_FAM3C_hepatocyte|T	CXADR_FAM3C	hepatocyte|T	0	CXADR_FAM3C	hepatocyte|T	0.663	p < 0.01
EFNA1_EPHA3_hepatocyte|T	EFNA1_EPHA3	hepatocyte|T	0	EFNA1_EPHA3	hepatocyte|T	0.662	p < 0.01
EFNA1_EPHA3_T|T	EFNA1_EPHA3	T|T	0	EFNA1_EPHA3	T|T	0.493	p < 0.01
EGFR_GRN_hepatocyte|T	EGFR_GRN	hepatocyte|T	0	EGFR_GRN	hepatocyte|T	1.005	p < 0.01
EGFR_MIF_hepatocyte|T	EGFR_MIF	hepatocyte|T	0	EGFR_MIF	hepatocyte|T	1.029	p < 0.01
EGFR_TGFB1_hepatocyte|T	EGFR_TGFB1	hepatocyte|T	0	EGFR_TGFB1	hepatocyte|T	1.111	p < 0.01
EREG_EGFR_T|hepatocyte	EREG_EGFR	T|hepatocyte	0	EREG_EGFR	T|hepatocyte	1.001	p < 0.01
EREG_ERBB4_T|hepatocyte	EREG_ERBB4	T|hepatocyte	0	EREG_ERBB4	T|hepatocyte	0.193	p < 0.01
F11R_aLb2 complex_hepatocyte|T	F11R_aLb2 complex	hepatocyte|T	0	F11R_aLb2 complex	hepatocyte|T	0.286	p < 0.01
FAM3C_CLEC2D_hepatocyte|T	FAM3C_CLEC2D	hepatocyte|T	0	FAM3C_CLEC2D	hepatocyte|T	0.536	p < 0.01
FAM3C_CLEC2D_T|T	FAM3C_CLEC2D	T|T	0	FAM3C_CLEC2D	T|T	0.466	p < 0.01
FBN1_a5b1 complex_T|hepatocyte	FBN1_a5b1 complex	T|hepatocyte	0	FBN1_a5b1 complex	T|hepatocyte	0.345	p < 0.01
FBN1_a5b1 complex_T|T	FBN1_a5b1 complex	T|T	0	FBN1_a5b1 complex	T|T	0.285	p < 0.01
FcRn complex_ALB_T|hepatocyte	FcRn complex_ALB	T|hepatocyte	0	FcRn complex_ALB	T|hepatocyte	3.996	p < 0.01
FGFR2_CD83_hepatocyte|T	FGFR2_CD83	hepatocyte|T	0	FGFR2_CD83	hepatocyte|T	0.592	p < 0.01
FGFR2_FGFR3_hepatocyte|T	FGFR2_FGFR3	hepatocyte|T	0	FGFR2_FGFR3	hepatocyte|T	0.465	p < 0.01
FGFR2_XPR1_hepatocyte|T	FGFR2_XPR1	hepatocyte|T	0	FGFR2_XPR1	hepatocyte|T	0.51	p < 0.01
FLT1_VEGFB_hepatocyte|T	FLT1_VEGFB	hepatocyte|T	0	FLT1_VEGFB	hepatocyte|T	0.594	p < 0.01
FN1_a4b1 complex_hepatocyte|T	FN1_a4b1 complex	hepatocyte|T	0	FN1_a4b1 complex	hepatocyte|T	0.64	p < 0.01
FN1_a4b7 complex_hepatocyte|T	FN1_a4b7 complex	hepatocyte|T	0	FN1_a4b7 complex	hepatocyte|T	0.553	p < 0.01
FN1_aVb1 complex_hepatocyte|T	FN1_aVb1 complex	hepatocyte|T	0.005	FN1_aVb1 complex	hepatocyte|T	0.592	p < 0.01
FN1_aVb5 complex_hepatocyte|T	FN1_aVb5 complex	hepatocyte|T	0.005	FN1_aVb5 complex	hepatocyte|T	0.592	p < 0.01
GPR37_PSAP_hepatocyte|T	GPR37_PSAP	hepatocyte|T	0	GPR37_PSAP	hepatocyte|T	0.35	p < 0.01
HLA-C_FAM3C_T|hepatocyte	HLA-C_FAM3C	T|hepatocyte	0	HLA-C_FAM3C	T|hepatocyte	3.27	p < 0.01
HLA-C_FAM3C_T|T	HLA-C_FAM3C	T|T	0	HLA-C_FAM3C	T|T	3.201	p < 0.01
ICAM1_aLb2 complex_hepatocyte|T	ICAM1_aLb2 complex	hepatocyte|T	0	ICAM1_aLb2 complex	hepatocyte|T	0.25	p < 0.01
ICAM1_aLb2 complex_T|T	ICAM1_aLb2 complex	T|T	0.004	ICAM1_aLb2 complex	T|T	0.224	p < 0.01
ICAM1_ITGAL_hepatocyte|T	ICAM1_ITGAL	hepatocyte|T	0	ICAM1_ITGAL	hepatocyte|T	0.25	p < 0.01
ICAM1_ITGAL_T|T	ICAM1_ITGAL	T|T	0.004	ICAM1_ITGAL	T|T	0.224	p < 0.01
ICAM1_SPN_hepatocyte|T	ICAM1_SPN	hepatocyte|T	0	ICAM1_SPN	hepatocyte|T	0.164	p < 0.01
ICAM1_SPN_T|T	ICAM1_SPN	T|T	0.024	ICAM1_SPN	T|T	0.139	p < 0.05
ICAM2_aLb2 complex_T|hepatocyte	ICAM2_aLb2 complex	T|hepatocyte	0.033	ICAM2_aLb2 complex	T|hepatocyte	0.181	p < 0.05
ICAM2_aLb2 complex_T|T	ICAM2_aLb2 complex	T|T	0	ICAM2_aLb2 complex	T|T	0.229	p < 0.01
ICAM3_aLb2 complex_T|hepatocyte	ICAM3_aLb2 complex	T|hepatocyte	0	ICAM3_aLb2 complex	T|hepatocyte	0.262	p < 0.01
ICAM3_aLb2 complex_T|T	ICAM3_aLb2 complex	T|T	0	ICAM3_aLb2 complex	T|T	0.31	p < 0.01
IFNG_Type II IFNR_T|hepatocyte	IFNG_Type II IFNR	T|hepatocyte	0	IFNG_Type II IFNR	T|hepatocyte	0.302	p < 0.01
IFNG_Type II IFNR_T|T	IFNG_Type II IFNR	T|T	0	IFNG_Type II IFNR	T|T	0.303	p < 0.01
IL7 receptor_IL7_T|hepatocyte	IL7 receptor_IL7	T|hepatocyte	0	IL7 receptor_IL7	T|hepatocyte	0.573	p < 0.01
IL7 receptor_IL7_T|T	IL7 receptor_IL7	T|T	0	IL7 receptor_IL7	T|T	0.566	p < 0.01
INHBE_ACVR2B_T|hepatocyte	INHBE_ACVR2B	T|hepatocyte	0	INHBE_ACVR2B	T|hepatocyte	0.168	p < 0.01
KLRB1_CLEC2D_T|hepatocyte	KLRB1_CLEC2D	T|hepatocyte	0	KLRB1_CLEC2D	T|hepatocyte	0.516	p < 0.01
KLRB1_CLEC2D_T|T	KLRB1_CLEC2D	T|T	0	KLRB1_CLEC2D	T|T	0.666	p < 0.01
LAMC1_a6b1 complex_T|hepatocyte	LAMC1_a6b1 complex	T|hepatocyte	0	LAMC1_a6b1 complex	T|hepatocyte	0.418	p < 0.01
LAMP1_FAM3C_T|hepatocyte	LAMP1_FAM3C	T|hepatocyte	0.02	LAMP1_FAM3C	T|hepatocyte	0.526	p < 0.05
LRP6_CKLF_hepatocyte|T	LRP6_CKLF	hepatocyte|T	0	LRP6_CKLF	hepatocyte|T	0.302	p < 0.01
LRP6_CKLF_T|T	LRP6_CKLF	T|T	0	LRP6_CKLF	T|T	0.256	p < 0.01
MIF_TNFRSF14_T|hepatocyte	MIF_TNFRSF14	T|hepatocyte	0	MIF_TNFRSF14	T|hepatocyte	0.244	p < 0.01
MIF_TNFRSF14_T|T	MIF_TNFRSF14	T|T	0	MIF_TNFRSF14	T|T	0.282	p < 0.01
NRP1_VEGFB_hepatocyte|T	NRP1_VEGFB	hepatocyte|T	0	NRP1_VEGFB	hepatocyte|T	0.631	p < 0.01
PDGFRB_PDGFD_T|hepatocyte	PDGFRB_PDGFD	T|hepatocyte	0	PDGFRB_PDGFD	T|hepatocyte	0.321	p < 0.01
PLXNB1_SEMA4D_hepatocyte|T	PLXNB1_SEMA4D	hepatocyte|T	0	PLXNB1_SEMA4D	hepatocyte|T	0.152	p < 0.01
PLXNB2_SEMA4D_hepatocyte|T	PLXNB2_SEMA4D	hepatocyte|T	0	PLXNB2_SEMA4D	hepatocyte|T	0.191	p < 0.01
SELL_SELPLG_T|T	SELL_SELPLG	T|T	0	SELL_SELPLG	T|T	0.165	p < 0.01
TGFB1_TGFbeta receptor1_T|T	TGFB1_TGFbeta receptor1	T|T	0	TGFB1_TGFbeta receptor1	T|T	0.264	p < 0.01
TGFB1_TGFbeta receptor2_T|hepatocyte	TGFB1_TGFbeta receptor2	T|hepatocyte	0	TGFB1_TGFbeta receptor2	T|hepatocyte	0.535	p < 0.01
TIMP1_FGFR2_T|hepatocyte	TIMP1_FGFR2	T|hepatocyte	0	TIMP1_FGFR2	T|hepatocyte	0.916	p < 0.01
TIMP1_FGFR2_T|T	TIMP1_FGFR2	T|T	0	TIMP1_FGFR2	T|T	0.707	p < 0.01
TNF_DAG1_T|hepatocyte	TNF_DAG1	T|hepatocyte	0	TNF_DAG1	T|hepatocyte	0.454	p < 0.01
TNF_DAG1_T|T	TNF_DAG1	T|T	0	TNF_DAG1	T|T	0.406	p < 0.01
TNF_FAS_T|T	TNF_FAS	T|T	0	TNF_FAS	T|T	0.412	p < 0.01
TNF_ICOS_T|T	TNF_ICOS	T|T	0	TNF_ICOS	T|T	0.435	p < 0.01
TNF_TNFRSF1A_T|hepatocyte	TNF_TNFRSF1A	T|hepatocyte	0	TNF_TNFRSF1A	T|hepatocyte	0.415	p < 0.01
TNF_TNFRSF1A_T|T	TNF_TNFRSF1A	T|T	0	TNF_TNFRSF1A	T|T	0.409	p < 0.01
TNF_TNFRSF1B_T|hepatocyte	TNF_TNFRSF1B	T|hepatocyte	0	TNF_TNFRSF1B	T|hepatocyte	0.419	p < 0.01
TNF_TNFRSF1B_T|T	TNF_TNFRSF1B	T|T	0	TNF_TNFRSF1B	T|T	0.514	p < 0.01
TNFRSF1A_GRN_T|hepatocyte	TNFRSF1A_GRN	T|hepatocyte	0	TNFRSF1A_GRN	T|hepatocyte	0.219	p < 0.01
TNFRSF1B_GRN_T|hepatocyte	TNFRSF1B_GRN	T|hepatocyte	0	TNFRSF1B_GRN	T|hepatocyte	0.324	p < 0.01
TNFRSF1B_GRN_T|T	TNFRSF1B_GRN	T|T	0	TNFRSF1B_GRN	T|T	0.263	p < 0.01
VEGFA_FLT1_T|hepatocyte	VEGFA_FLT1	T|hepatocyte	0	VEGFA_FLT1	T|hepatocyte	0.685	p < 0.01
VTN_aVb1 complex_hepatocyte|T	VTN_aVb1 complex	hepatocyte|T	0.023	VTN_aVb1 complex	hepatocyte|T	0.337	p < 0.05

## Sheet: scRNA-seq
Table SIII The interaction results of hepatocytes and T cells (ligand–receptor interactions)
joinlab	interacting_pair.x	CC.x	pvals	interacting_pair.y	CC.y	means	significance
ADRB2_VEGFB_T|T	ADRB2_VEGFB	T|T	0	ADRB2_VEGFB	T|T	0.204	p < 0.01
CD2_CD58_T|T	CD2_CD58	T|T	0	CD2_CD58	T|T	1.885	p < 0.01
CD47_SIRPG_T|hepatocyte	CD47_SIRPG	T|hepatocyte	0	CD47_SIRPG	T|hepatocyte	0.33	p < 0.01
CD47_SIRPG_T|T	CD47_SIRPG	T|T	0	CD47_SIRPG	T|T	0.371	p < 0.01
CD55_ADGRE5_T|T	CD55_ADGRE5	T|T	0	CD55_ADGRE5	T|T	0.338	p < 0.01
CD74_COPA_hepatocyte|T	CD74_COPA	hepatocyte|T	0	CD74_COPA	hepatocyte|T	2.064	p < 0.01
CD74_MIF_hepatocyte|T	CD74_MIF	hepatocyte|T	0	CD74_MIF	hepatocyte|T	2.299	p < 0.01
CD8 receptor_LCK_hepatocyte|T	CD8 receptor_LCK	hepatocyte|T	0	CD8 receptor_LCK	hepatocyte|T	0.764	p < 0.01
CD8 receptor_LCK_T|T	CD8 receptor_LCK	T|T	0	CD8 receptor_LCK	T|T	0.733	p < 0.01
FAM3C_CLEC2D_hepatocyte|T	FAM3C_CLEC2D	hepatocyte|T	0	FAM3C_CLEC2D	hepatocyte|T	0.547	p < 0.01
FAM3C_CLEC2D_T|T	FAM3C_CLEC2D	T|T	0	FAM3C_CLEC2D	T|T	0.535	p < 0.01
HLA-C_FAM3C_T|hepatocyte	HLA-C_FAM3C	T|hepatocyte	0	HLA-C_FAM3C	T|hepatocyte	6.153	p < 0.01
HLA-C_FAM3C_T|T	HLA-C_FAM3C	T|T	0	HLA-C_FAM3C	T|T	6.141	p < 0.01
HLA-DPA1_TNFSF9_hepatocyte|T	HLA-DPA1_TNFSF9	hepatocyte|T	0	HLA-DPA1_TNFSF9	hepatocyte|T	0.59	p < 0.01
HLA-DPB1_TNFSF13B_hepatocyte|T	HLA-DPB1_TNFSF13B	hepatocyte|T	0	HLA-DPB1_TNFSF13B	hepatocyte|T	0.502	p < 0.01
ICAM2_aLb2 complex_T|T	ICAM2_aLb2 complex	T|T	0	ICAM2_aLb2 complex	T|T	0.389	p < 0.01
ICAM3_aLb2 complex_T|hepatocyte	ICAM3_aLb2 complex	T|hepatocyte	0	ICAM3_aLb2 complex	T|hepatocyte	0.516	p < 0.01
ICAM3_aLb2 complex_T|T	ICAM3_aLb2 complex	T|T	0	ICAM3_aLb2 complex	T|T	0.585	p < 0.01
KLRB1_CLEC2D_T|hepatocyte	KLRB1_CLEC2D	T|hepatocyte	0	KLRB1_CLEC2D	T|hepatocyte	1.28	p < 0.01
KLRB1_CLEC2D_T|T	KLRB1_CLEC2D	T|T	0	KLRB1_CLEC2D	T|T	1.457	p < 0.01
LAMP1_FAM3C_T|hepatocyte	LAMP1_FAM3C	T|hepatocyte	0	LAMP1_FAM3C	T|hepatocyte	0.271	p < 0.01
LGALS9_CD44_T|T	LGALS9_CD44	T|T	0	LGALS9_CD44	T|T	0.62	p < 0.01
LGALS9_CD47_T|T	LGALS9_CD47	T|T	0	LGALS9_CD47	T|T	0.301	p < 0.01
LGALS9_SLC1A5_T|T	LGALS9_SLC1A5	T|T	0	LGALS9_SLC1A5	T|T	0.141	p < 0.01
LGALS9_SORL1_T|T	LGALS9_SORL1	T|T	0	LGALS9_SORL1	T|T	0.16	p < 0.01
LTA_TNFRSF14_T|T	LTA_TNFRSF14	T|T	0	LTA_TNFRSF14	T|T	0.407	p < 0.01
LTA_TNFRSF1A_T|T	LTA_TNFRSF1A	T|T	0	LTA_TNFRSF1A	T|T	0.18	p < 0.01
LTA_TNFRSF1B_T|T	LTA_TNFRSF1B	T|T	0	LTA_TNFRSF1B	T|T	0.429	p < 0.01
MIF_TNFRSF14_hepatocyte|T	MIF_TNFRSF14	hepatocyte|T	0.001	MIF_TNFRSF14	hepatocyte|T	0.454	p < 0.01
MIF_TNFRSF14_T|T	MIF_TNFRSF14	T|T	0	MIF_TNFRSF14	T|T	0.593	p < 0.01
PDCD1_FAM3C_hepatocyte|T	PDCD1_FAM3C	hepatocyte|T	0.008	PDCD1_FAM3C	hepatocyte|T	0.211	p < 0.01
PGRMC2_CCL4L2_T|hepatocyte	PGRMC2_CCL4L2	T|hepatocyte	0	PGRMC2_CCL4L2	T|hepatocyte	0.477	p < 0.01
SELL_SELPLG_T|hepatocyte	SELL_SELPLG	T|hepatocyte	0	SELL_SELPLG	T|hepatocyte	0.309	p < 0.01
SELL_SELPLG_T|T	SELL_SELPLG	T|T	0	SELL_SELPLG	T|T	0.383	p < 0.01
TNF_FAS_T|T	TNF_FAS	T|T	0	TNF_FAS	T|T	1	p < 0.01
TNF_ICOS_T|T	TNF_ICOS	T|T	0	TNF_ICOS	T|T	1.086	p < 0.01
TNF_TNFRSF1A_T|T	TNF_TNFRSF1A	T|T	0	TNF_TNFRSF1A	T|T	0.944	p < 0.01
TNF_TNFRSF1B_T|hepatocyte	TNF_TNFRSF1B	T|hepatocyte	0	TNF_TNFRSF1B	T|hepatocyte	1.046	p < 0.01
TNF_TNFRSF1B_T|T	TNF_TNFRSF1B	T|T	0	TNF_TNFRSF1B	T|T	1.193	p < 0.01
TNFRSF1A_GRN_T|hepatocyte	TNFRSF1A_GRN	T|hepatocyte	0	TNFRSF1A_GRN	T|hepatocyte	0.19	p < 0.01
TNFRSF1B_GRN_T|hepatocyte	TNFRSF1B_GRN	T|hepatocyte	0	TNFRSF1B_GRN	T|hepatocyte	0.44	p < 0.01
TNFSF12_TNFRSF25_T|T	TNFSF12_TNFRSF25	T|T	0	TNFSF12_TNFRSF25	T|T	0.343	p < 0.01
TNFSF14_TNFRSF14_T|T	TNFSF14_TNFRSF14	T|T	0	TNFSF14_TNFRSF14	T|T	0.398	p < 0.01

## Sheet: snRNA-seq
Table SIII The interaction results of hepatocytes and T cells (ligand–receptor interactions)
joinlab	interacting_pair.x	CC.x	pvals	interacting_pair.y	CC.y	means	significance
ACVR_1A2A receptor_INHBA_T|hepatocyte	ACVR_1A2A receptor_INHBA	T|hepatocyte	0	ACVR_1A2A receptor_INHBA	T|hepatocyte	0.679	p < 0.01
ACVR2A_INHBC_T|hepatocyte	ACVR2A_INHBC	T|hepatocyte	0	ACVR2A_INHBC	T|hepatocyte	0.35	p < 0.01
ACVR2A_INHBE_hepatocyte|T	ACVR2A_INHBE	hepatocyte|T	0	ACVR2A_INHBE	hepatocyte|T	0.361	p < 0.01
ACVR2A_INHBE_T|T	ACVR2A_INHBE	T|T	0	ACVR2A_INHBE	T|T	0.379	p < 0.01
C5_C5AR2_hepatocyte|T	C5_C5AR2	hepatocyte|T	0	C5_C5AR2	hepatocyte|T	1.574	p < 0.01
CD2_CD58_T|hepatocyte	CD2_CD58	T|hepatocyte	0	CD2_CD58	T|hepatocyte	0.231	p < 0.01
CD2_CD58_T|T	CD2_CD58	T|T	0	CD2_CD58	T|T	0.217	p < 0.01
CD40_TNFSF13B_hepatocyte|T	CD40_TNFSF13B	hepatocyte|T	0	CD40_TNFSF13B	hepatocyte|T	0.451	p < 0.01
CD44_FGFR2_T|hepatocyte	CD44_FGFR2	T|hepatocyte	0	CD44_FGFR2	T|hepatocyte	0.719	p < 0.01
CD55_ADGRE5_T|T	CD55_ADGRE5	T|T	0	CD55_ADGRE5	T|T	0.237	p < 0.01
CD6_ALCAM_T|hepatocyte	CD6_ALCAM	T|hepatocyte	0	CD6_ALCAM	T|hepatocyte	1.209	p < 0.01
CD74_APP_T|hepatocyte	CD74_APP	T|hepatocyte	0	CD74_APP	T|hepatocyte	1.174	p < 0.01
CD74_COPA_T|hepatocyte	CD74_COPA	T|hepatocyte	0	CD74_COPA	T|hepatocyte	1.166	p < 0.01
COL11A1_a11b1 complex_hepatocyte|T	COL11A1_a11b1 complex	hepatocyte|T	0	COL11A1_a11b1 complex	hepatocyte|T	0.172	p < 0.01
COL11A1_a11b1 complex_T|T	COL11A1_a11b1 complex	T|T	0	COL11A1_a11b1 complex	T|T	0.174	p < 0.01
COL11A1_a1b1 complex_T|hepatocyte	COL11A1_a1b1 complex	T|hepatocyte	0	COL11A1_a1b1 complex	T|hepatocyte	0.67	p < 0.01
COL14A1_a11b1 complex_T|T	COL14A1_a11b1 complex	T|T	0	COL14A1_a11b1 complex	T|T	0.282	p < 0.01
COL14A1_a1b1 complex_T|hepatocyte	COL14A1_a1b1 complex	T|hepatocyte	0	COL14A1_a1b1 complex	T|hepatocyte	0.778	p < 0.01
COL14A1_a1b1 complex_T|T	COL14A1_a1b1 complex	T|T	0.004	COL14A1_a1b1 complex	T|T	0.683	p < 0.01
COL18A1_a11b1 complex_hepatocyte|T	COL18A1_a11b1 complex	hepatocyte|T	0	COL18A1_a11b1 complex	hepatocyte|T	1.303	p < 0.01
COL18A1_a1b1 complex_hepatocyte|T	COL18A1_a1b1 complex	hepatocyte|T	0	COL18A1_a1b1 complex	hepatocyte|T	1.705	p < 0.01
COL19A1_a11b1 complex_hepatocyte|T	COL19A1_a11b1 complex	hepatocyte|T	0	COL19A1_a11b1 complex	hepatocyte|T	0.185	p < 0.01
COL19A1_a11b1 complex_T|T	COL19A1_a11b1 complex	T|T	0	COL19A1_a11b1 complex	T|T	0.153	p < 0.01
COL19A1_a1b1 complex_T|hepatocyte	COL19A1_a1b1 complex	T|hepatocyte	0.004	COL19A1_a1b1 complex	T|hepatocyte	0.649	p < 0.01
COL1A1_a11b1 complex_T|T	COL1A1_a11b1 complex	T|T	0	COL1A1_a11b1 complex	T|T	0.262	p < 0.01
COL1A1_a1b1 complex_T|hepatocyte	COL1A1_a1b1 complex	T|hepatocyte	0	COL1A1_a1b1 complex	T|hepatocyte	0.759	p < 0.01
COL1A1_a1b1 complex_T|T	COL1A1_a1b1 complex	T|T	0.011	COL1A1_a1b1 complex	T|T	0.664	p < 0.05
COL1A2_a11b1 complex_T|T	COL1A2_a11b1 complex	T|T	0	COL1A2_a11b1 complex	T|T	0.329	p < 0.01
COL1A2_a1b1 complex_T|hepatocyte	COL1A2_a1b1 complex	T|hepatocyte	0	COL1A2_a1b1 complex	T|hepatocyte	0.826	p < 0.01
COL1A2_a1b1 complex_T|T	COL1A2_a1b1 complex	T|T	0	COL1A2_a1b1 complex	T|T	0.731	p < 0.01
COL21A1_a11b1 complex_hepatocyte|T	COL21A1_a11b1 complex	hepatocyte|T	0	COL21A1_a11b1 complex	hepatocyte|T	0.207	p < 0.01
COL24A1_a11b1 complex_hepatocyte|T	COL24A1_a11b1 complex	hepatocyte|T	0	COL24A1_a11b1 complex	hepatocyte|T	0.178	p < 0.01
COL27A1_a11b1 complex_hepatocyte|T	COL27A1_a11b1 complex	hepatocyte|T	0	COL27A1_a11b1 complex	hepatocyte|T	0.419	p < 0.01
COL27A1_a11b1 complex_T|T	COL27A1_a11b1 complex	T|T	0.008	COL27A1_a11b1 complex	T|T	0.364	p < 0.01
COL3A1_a11b1 complex_T|T	COL3A1_a11b1 complex	T|T	0	COL3A1_a11b1 complex	T|T	0.35	p < 0.01
COL3A1_a1b1 complex_T|hepatocyte	COL3A1_a1b1 complex	T|hepatocyte	0	COL3A1_a1b1 complex	T|hepatocyte	0.846	p < 0.01
COL3A1_a1b1 complex_T|T	COL3A1_a1b1 complex	T|T	0	COL3A1_a1b1 complex	T|T	0.751	p < 0.01
COL4A1_a11b1 complex_T|T	COL4A1_a11b1 complex	T|T	0	COL4A1_a11b1 complex	T|T	0.424	p < 0.01
COL4A1_a1b1 complex_T|hepatocyte	COL4A1_a1b1 complex	T|hepatocyte	0	COL4A1_a1b1 complex	T|hepatocyte	0.921	p < 0.01
COL4A1_a1b1 complex_T|T	COL4A1_a1b1 complex	T|T	0.008	COL4A1_a1b1 complex	T|T	0.826	p < 0.01
COL4A2_a11b1 complex_T|T	COL4A2_a11b1 complex	T|T	0	COL4A2_a11b1 complex	T|T	0.488	p < 0.01
COL4A2_a1b1 complex_T|hepatocyte	COL4A2_a1b1 complex	T|hepatocyte	0	COL4A2_a1b1 complex	T|hepatocyte	0.984	p < 0.01
COL4A2_a1b1 complex_T|T	COL4A2_a1b1 complex	T|T	0.004	COL4A2_a1b1 complex	T|T	0.889	p < 0.01
COL4A3_a11b1 complex_T|T	COL4A3_a11b1 complex	T|T	0	COL4A3_a11b1 complex	T|T	0.213	p < 0.01
COL4A3_a1b1 complex_T|hepatocyte	COL4A3_a1b1 complex	T|hepatocyte	0	COL4A3_a1b1 complex	T|hepatocyte	0.71	p < 0.01
COL4A4_a11b1 complex_T|T	COL4A4_a11b1 complex	T|T	0	COL4A4_a11b1 complex	T|T	0.341	p < 0.01
COL4A4_a1b1 complex_T|hepatocyte	COL4A4_a1b1 complex	T|hepatocyte	0	COL4A4_a1b1 complex	T|hepatocyte	0.838	p < 0.01
COL4A4_a1b1 complex_T|T	COL4A4_a1b1 complex	T|T	0	COL4A4_a1b1 complex	T|T	0.743	p < 0.01
COL5A1_a11b1 complex_T|T	COL5A1_a11b1 complex	T|T	0	COL5A1_a11b1 complex	T|T	0.238	p < 0.01
COL5A1_a1b1 complex_T|hepatocyte	COL5A1_a1b1 complex	T|hepatocyte	0	COL5A1_a1b1 complex	T|hepatocyte	0.735	p < 0.01
COL5A1_a1b1 complex_T|T	COL5A1_a1b1 complex	T|T	0.004	COL5A1_a1b1 complex	T|T	0.64	p < 0.01
COL5A2_a11b1 complex_T|T	COL5A2_a11b1 complex	T|T	0	COL5A2_a11b1 complex	T|T	0.286	p < 0.01
COL5A2_a1b1 complex_T|hepatocyte	COL5A2_a1b1 complex	T|hepatocyte	0	COL5A2_a1b1 complex	T|hepatocyte	0.783	p < 0.01
COL5A2_a1b1 complex_T|T	COL5A2_a1b1 complex	T|T	0	COL5A2_a1b1 complex	T|T	0.688	p < 0.01
COL5A3_a11b1 complex_hepatocyte|T	COL5A3_a11b1 complex	hepatocyte|T	0	COL5A3_a11b1 complex	hepatocyte|T	0.354	p < 0.01
COL5A3_a11b1 complex_T|T	COL5A3_a11b1 complex	T|T	0	COL5A3_a11b1 complex	T|T	0.319	p < 0.01
COL6A1_a11b1 complex_T|T	COL6A1_a11b1 complex	T|T	0	COL6A1_a11b1 complex	T|T	0.346	p < 0.01
COL6A1_a1b1 complex_T|hepatocyte	COL6A1_a1b1 complex	T|hepatocyte	0	COL6A1_a1b1 complex	T|hepatocyte	0.842	p < 0.01
COL6A1_a1b1 complex_T|T	COL6A1_a1b1 complex	T|T	0	COL6A1_a1b1 complex	T|T	0.747	p < 0.01
COL6A2_a11b1 complex_T|T	COL6A2_a11b1 complex	T|T	0	COL6A2_a11b1 complex	T|T	0.343	p < 0.01
COL6A2_a1b1 complex_T|hepatocyte	COL6A2_a1b1 complex	T|hepatocyte	0	COL6A2_a1b1 complex	T|hepatocyte	0.84	p < 0.01
COL6A2_a1b1 complex_T|T	COL6A2_a1b1 complex	T|T	0	COL6A2_a1b1 complex	T|T	0.744	p < 0.01
COL6A3_a11b1 complex_T|T	COL6A3_a11b1 complex	T|T	0	COL6A3_a11b1 complex	T|T	0.251	p < 0.01
COL6A3_a1b1 complex_T|hepatocyte	COL6A3_a1b1 complex	T|hepatocyte	0	COL6A3_a1b1 complex	T|hepatocyte	0.748	p < 0.01
COL6A3_a1b1 complex_T|T	COL6A3_a1b1 complex	T|T	0	COL6A3_a1b1 complex	T|T	0.652	p < 0.01
COL9A3_a11b1 complex_hepatocyte|T	COL9A3_a11b1 complex	hepatocyte|T	0	COL9A3_a11b1 complex	hepatocyte|T	0.184	p < 0.01
COL9A3_a11b1 complex_T|T	COL9A3_a11b1 complex	T|T	0	COL9A3_a11b1 complex	T|T	0.192	p < 0.01
COL9A3_a1b1 complex_T|hepatocyte	COL9A3_a1b1 complex	T|hepatocyte	0	COL9A3_a1b1 complex	T|hepatocyte	0.688	p < 0.01
CXADR_FAM3C_hepatocyte|T	CXADR_FAM3C	hepatocyte|T	0	CXADR_FAM3C	hepatocyte|T	0.903	p < 0.01
EFNA1_EPHA1_hepatocyte|T	EFNA1_EPHA1	hepatocyte|T	0	EFNA1_EPHA1	hepatocyte|T	0.492	p < 0.01
EFNA1_EPHA3_hepatocyte|T	EFNA1_EPHA3	hepatocyte|T	0	EFNA1_EPHA3	hepatocyte|T	0.941	p < 0.01
EFNA1_EPHA3_T|T	EFNA1_EPHA3	T|T	0	EFNA1_EPHA3	T|T	0.781	p < 0.01
EGFR_GRN_hepatocyte|T	EGFR_GRN	hepatocyte|T	0	EGFR_GRN	hepatocyte|T	1.351	p < 0.01
EGFR_TGFB1_hepatocyte|T	EGFR_TGFB1	hepatocyte|T	0	EGFR_TGFB1	hepatocyte|T	1.371	p < 0.01
EREG_EGFR_T|hepatocyte	EREG_EGFR	T|hepatocyte	0	EREG_EGFR	T|hepatocyte	1.371	p < 0.01
EREG_ERBB4_T|hepatocyte	EREG_ERBB4	T|hepatocyte	0	EREG_ERBB4	T|hepatocyte	0.281	p < 0.01
FAM3C_CLEC2D_hepatocyte|T	FAM3C_CLEC2D	hepatocyte|T	0	FAM3C_CLEC2D	hepatocyte|T	0.485	p < 0.01
FAM3C_CLEC2D_T|T	FAM3C_CLEC2D	T|T	0	FAM3C_CLEC2D	T|T	0.425	p < 0.01
FBN1_a5b1 complex_T|hepatocyte	FBN1_a5b1 complex	T|hepatocyte	0	FBN1_a5b1 complex	T|hepatocyte	0.5	p < 0.01
FBN1_a5b1 complex_T|T	FBN1_a5b1 complex	T|T	0	FBN1_a5b1 complex	T|T	0.44	p < 0.01
FcRn complex_ALB_T|hepatocyte	FcRn complex_ALB	T|hepatocyte	0	FcRn complex_ALB	T|hepatocyte	4.532	p < 0.01
FGFR2_FGFR3_hepatocyte|T	FGFR2_FGFR3	hepatocyte|T	0	FGFR2_FGFR3	hepatocyte|T	0.649	p < 0.01
FGFR2_XPR1_hepatocyte|T	FGFR2_XPR1	hepatocyte|T	0	FGFR2_XPR1	hepatocyte|T	0.717	p < 0.01
FLT1_VEGFB_hepatocyte|T	FLT1_VEGFB	hepatocyte|T	0	FLT1_VEGFB	hepatocyte|T	0.7	p < 0.01
FN1_a11b1 complex_hepatocyte|T	FN1_a11b1 complex	hepatocyte|T	0	FN1_a11b1 complex	hepatocyte|T	0.74	p < 0.01
FN1_a11b1 complex_T|T	FN1_a11b1 complex	T|T	0	FN1_a11b1 complex	T|T	0.733	p < 0.01
FN1_a4b1 complex_hepatocyte|T	FN1_a4b1 complex	hepatocyte|T	0	FN1_a4b1 complex	hepatocyte|T	0.765	p < 0.01
FN1_a4b1 complex_T|T	FN1_a4b1 complex	T|T	0	FN1_a4b1 complex	T|T	0.757	p < 0.01
GPR37_PSAP_hepatocyte|T	GPR37_PSAP	hepatocyte|T	0	GPR37_PSAP	hepatocyte|T	0.42	p < 0.01
HGF_CD44_T|T	HGF_CD44	T|T	0	HGF_CD44	T|T	0.357	p < 0.01
HLA-C_FAM3C_hepatocyte|T	HLA-C_FAM3C	hepatocyte|T	0	HLA-C_FAM3C	hepatocyte|T	1.8	p < 0.01
ICAM1_ITGAL_hepatocyte|T	ICAM1_ITGAL	hepatocyte|T	0	ICAM1_ITGAL	hepatocyte|T	0.234	p < 0.01
INHBE_ACVR2B_T|hepatocyte	INHBE_ACVR2B	T|hepatocyte	0	INHBE_ACVR2B	T|hepatocyte	0.248	p < 0.01
LAMC1_a6b1 complex_T|hepatocyte	LAMC1_a6b1 complex	T|hepatocyte	0.004	LAMC1_a6b1 complex	T|hepatocyte	0.547	p < 0.01
LTBR_LTB_hepatocyte|T	LTBR_LTB	hepatocyte|T	0	LTBR_LTB	hepatocyte|T	0.194	p < 0.01
LTBR_LTB_T|T	LTBR_LTB	T|T	0	LTBR_LTB	T|T	0.187	p < 0.01
MET_HGF_hepatocyte|T	MET_HGF	hepatocyte|T	0	MET_HGF	hepatocyte|T	1	p < 0.01
NRP1_VEGFB_hepatocyte|T	NRP1_VEGFB	hepatocyte|T	0	NRP1_VEGFB	hepatocyte|T	0.813	p < 0.01
PDGFRB_PDGFD_T|hepatocyte	PDGFRB_PDGFD	T|hepatocyte	0	PDGFRB_PDGFD	T|hepatocyte	0.463	p < 0.01
PLXNB1_SEMA4D_hepatocyte|T	PLXNB1_SEMA4D	hepatocyte|T	0	PLXNB1_SEMA4D	hepatocyte|T	0.162	p < 0.01
PLXNB2_SEMA4D_hepatocyte|T	PLXNB2_SEMA4D	hepatocyte|T	0	PLXNB2_SEMA4D	hepatocyte|T	0.21	p < 0.01
PVR_CD226_hepatocyte|T	PVR_CD226	hepatocyte|T	0	PVR_CD226	hepatocyte|T	0.213	p < 0.01
PVR_CD96_hepatocyte|T	PVR_CD96	hepatocyte|T	0	PVR_CD96	hepatocyte|T	0.239	p < 0.01
TFRC_TNFSF13B_hepatocyte|T	TFRC_TNFSF13B	hepatocyte|T	0.012	TFRC_TNFSF13B	hepatocyte|T	0.443	p < 0.05
TG_ASGR1_T|hepatocyte	TG_ASGR1	T|hepatocyte	0	TG_ASGR1	T|hepatocyte	5.429	p < 0.01
TGFB1_TGFbeta receptor1_hepatocyte|T	TGFB1_TGFbeta receptor1	hepatocyte|T	0.004	TGFB1_TGFbeta receptor1	hepatocyte|T	0.206	p < 0.01
TGFB1_TGFbeta receptor1_T|T	TGFB1_TGFbeta receptor1	T|T	0	TGFB1_TGFbeta receptor1	T|T	0.225	p < 0.01
TGFB1_TGFbeta receptor2_T|hepatocyte	TGFB1_TGFbeta receptor2	T|hepatocyte	0	TGFB1_TGFbeta receptor2	T|hepatocyte	0.591	p < 0.01
TIMP1_FGFR2_T|hepatocyte	TIMP1_FGFR2	T|hepatocyte	0	TIMP1_FGFR2	T|hepatocyte	1.219	p < 0.01
TIMP1_FGFR2_T|T	TIMP1_FGFR2	T|T	0	TIMP1_FGFR2	T|T	0.978	p < 0.01
TNFRSF10B_TNFSF10_T|hepatocyte	TNFRSF10B_TNFSF10	T|hepatocyte	0	TNFRSF10B_TNFSF10	T|hepatocyte	0.662	p < 0.01
TNFRSF1A_GRN_T|hepatocyte	TNFRSF1A_GRN	T|hepatocyte	0	TNFRSF1A_GRN	T|hepatocyte	0.231	p < 0.01
TNFRSF1B_GRN_T|hepatocyte	TNFRSF1B_GRN	T|hepatocyte	0	TNFRSF1B_GRN	T|hepatocyte	0.249	p < 0.01
TNFSF14_LTBR_hepatocyte|T	TNFSF14_LTBR	hepatocyte|T	0	TNFSF14_LTBR	hepatocyte|T	0.143	p < 0.01
VEGFA_FLT1_T|hepatocyte	VEGFA_FLT1	T|hepatocyte	0	VEGFA_FLT1	T|hepatocyte	0.897	p < 0.01
